# Supplementary material for: Co-assembly of charge complementary peptides and their applications as organic dye/heavy metal ion (Pb2+, Hg2+) absorbents and arsenic(iii/v) detectors
Source: Royal Society of Chemistry journal article supplement (doi:10.1039/d0ra08407g), 2020-01-01
Supplement: d0ra08407g1.pdf [file d0ra08407g1.pdf]

## Supporting Information

### **Co-assembly of Charged Complementary Peptides and their Applications as Organic**

### **Dye / Heavy Metal Ion ( $\text{Pb}^{2+}$ , $\text{Hg}^{2+}$ ) Absorbents and Arsenic (III/V) Detectors**

Karabi Roy<sup>1</sup>, Monikha Chetia<sup>1</sup>, Ankan Kumar Sarkar<sup>1</sup>, Sunanda Chatterjee<sup>1\*</sup>

1, Department of Chemistry,  
Indian Institute of Technology Guwahati  
Guwahati, Assam, India 781039.  
Email: sunanda.c@iitg.ac.in  
Telephone: 0361-2583310

## Table of contents

| Contents                                                                                                                                                                                                | Page |
|---------------------------------------------------------------------------------------------------------------------------------------------------------------------------------------------------------|------|
| 1. <b>Figure S1:</b> Analytical HPLC trace of the peptides a) A1 and b) A2.                                                                                                                             | 3    |
| 2. <b>Figure S2:</b> ESI-MS of A1.                                                                                                                                                                      | 3    |
| 3. <b>Figure S3:</b> ESI-MS of A2.                                                                                                                                                                      | 4    |
| 4. <b>Figure S4:</b> $^1\text{H}$ NMR spectra of A1.                                                                                                                                                    | 4    |
| 5. <b>Figure S5:</b> $^1\text{H}$ NMR spectra of A2.                                                                                                                                                    | 5    |
| 6. <b>Figure S6:</b> FESEM images of A1 hydrogel in sodium phosphate buffer and EtOH/sodium phosphate buffer.                                                                                           | 5    |
| 7. <b>Figure S7:</b> Rheology of A1 hydrogel.                                                                                                                                                           | 6    |
| 8. <b>Figure S8:</b> Schematic showing the mechanism of self-assembly of A1.                                                                                                                            | 6    |
| 9. <b>Figure S9:</b> Dye/ metal absorption studies by A1 hydrogel using UV spectroscopy                                                                                                                 | 7    |
| 10. <b>Figure S10:</b> UV studies showing dye absorption by (A1+A2) co-assembled gel and dye/metal absorption from a mixture of contaminants by A1 and A1+A2 hydrogels.                                 | 7    |
| 11. <b>Figure S11:</b> Reusability of the A1 hydrogel.                                                                                                                                                  | 8    |
| 12. <b>Figure S12:</b> Morphology of hydrogel A1 a) before absorption and b) after release of the dye Rhodamine B.                                                                                      | 8    |
| 13. <b>Figure S13:</b> Anion sensing by A1 and A2.                                                                                                                                                      |      |
| 14. <b>Figure S14:</b> Metal ion sensing by A1 and A2.                                                                                                                                                  | 9    |
| 15. <b>Figure S15:</b> Concentration dependent titration of A2 with $\text{AsO}_2^-$ , $\text{AsO}_3^-$ , $\text{OH}^-$                                                                                 | 9    |
| 16. <b>Figure S16:</b> $\text{Fe}^{3+}$ sensing by A1 and A2: Titration of a) A1 and b) A2 with different concentrations of $\text{Fe}^{3+}$ .                                                          | 10   |
| 17. <b>Table S1:</b> Gelation properties, physical state, Critical Gelation Concentration (MGC) and sol-gel conversion temperature ( $T_{\text{gel}}$ ) of A1, A2 and various ratios of A1+A2 mixtures. | 11   |
| 18. <b>Table S2:</b> Interplanar distances observed from the PXRD in A1, A2, A1 xerogel, 1:0.5 and 1:1 co-assembled xerogels of A1+A2.                                                                  | 11   |
| 19. <b>Table S3:</b> Percentage of RB absorbed by hydrogel in three cycles                                                                                                                              | 12   |
| 20. <b>Table S4:</b> Dependence of absorption of $\text{Hg}^{2+}$ and $\text{Pb}^{2+}$ by A1 hydrogel on the counter anions                                                                             | 12   |

## Figures

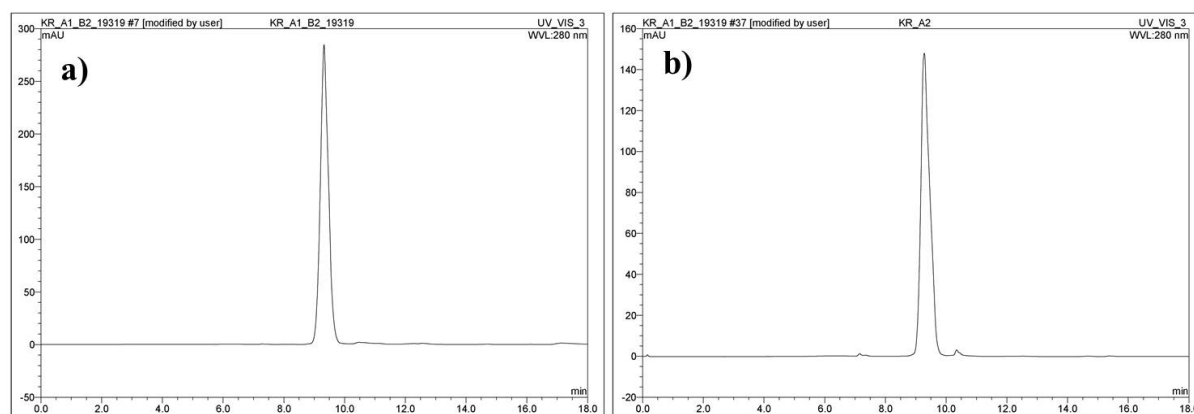

**Figure S1:** Analytical HPLC trace of the peptides a) A1 and b) A2

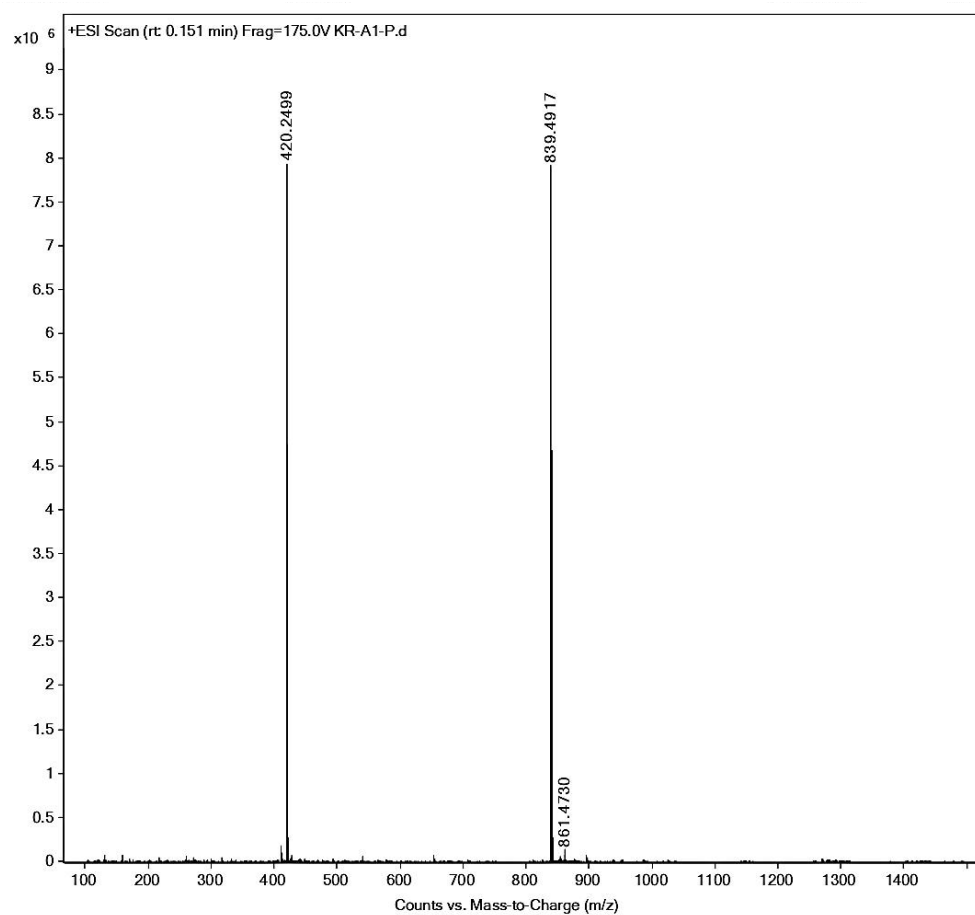

**Figure S2:** ESI-MS of A1.

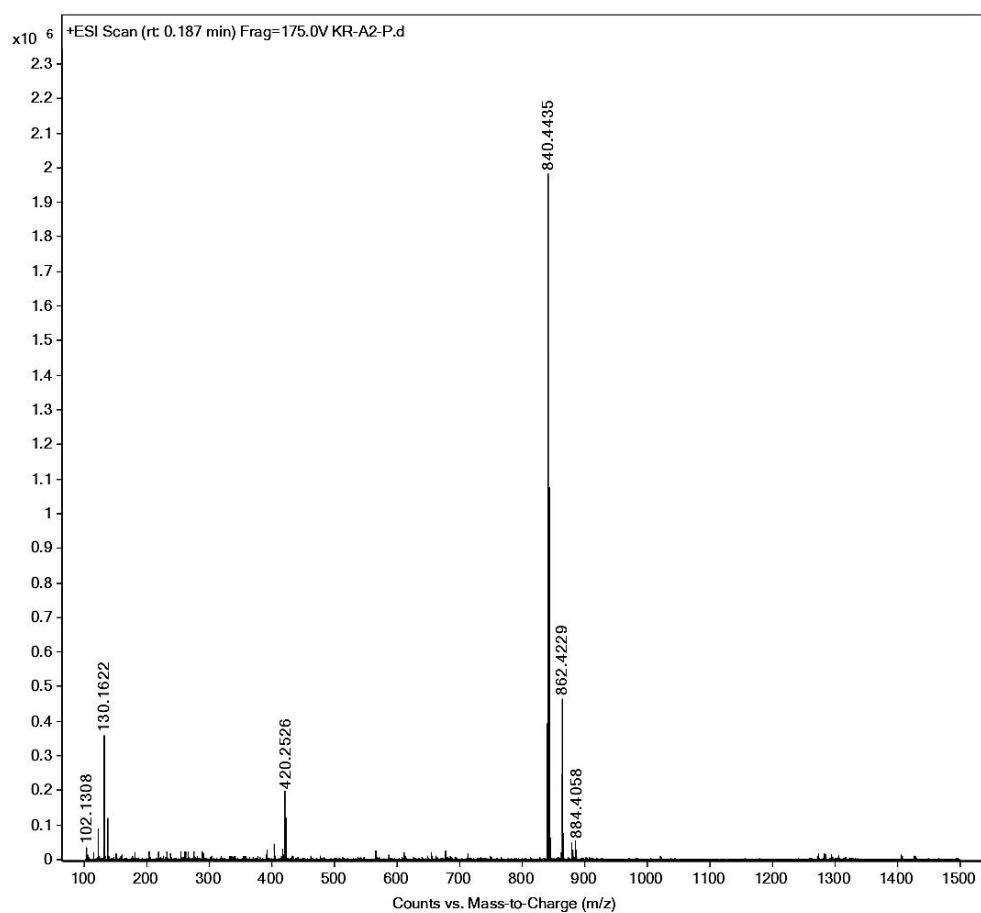

**Figure S3:** ESI-MS of A2.

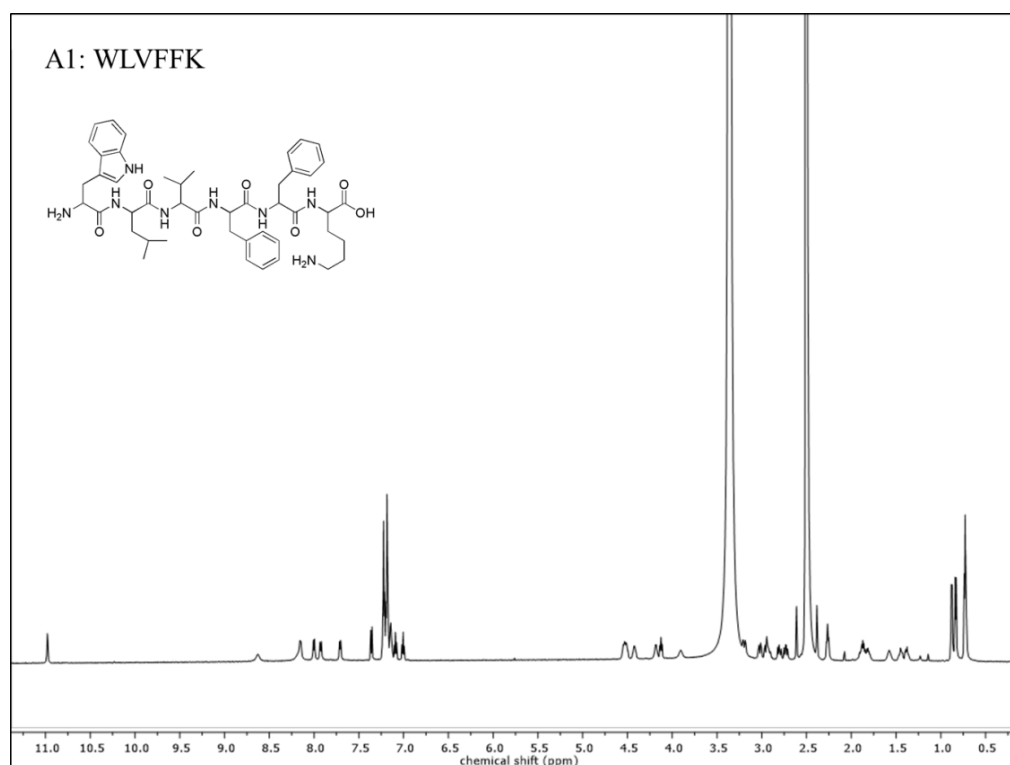

**Figure S4:** <sup>1</sup>H NMR spectra of A1.

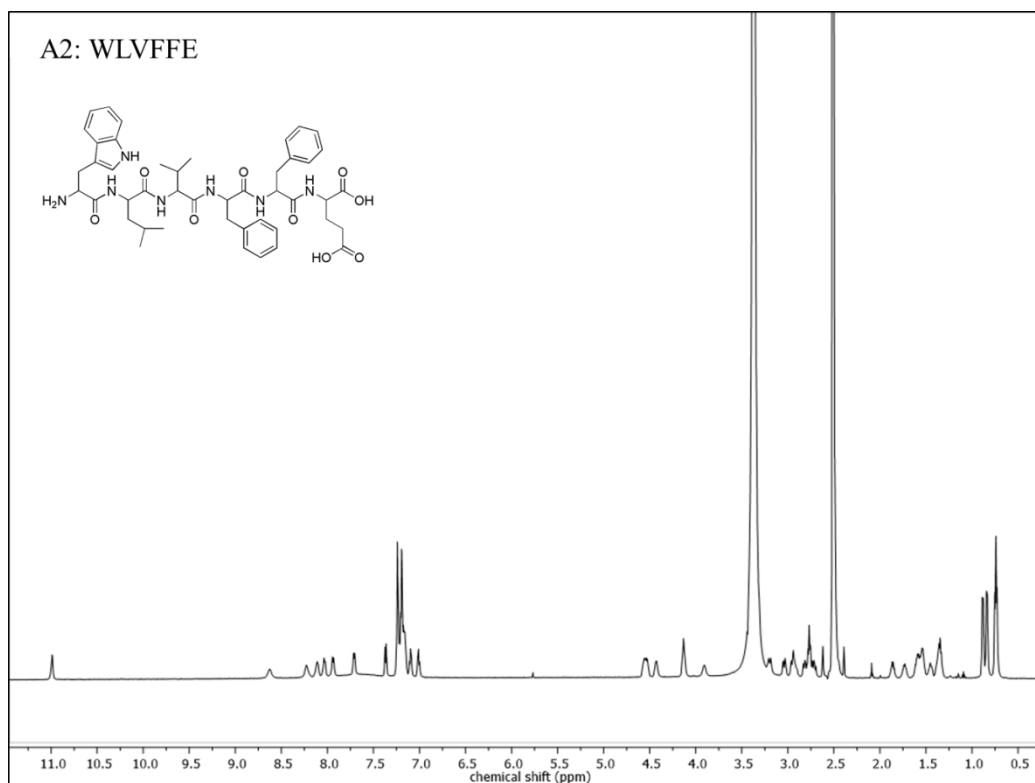

**Figure S5:**  $^1\text{H}$  NMR spectra of A2.

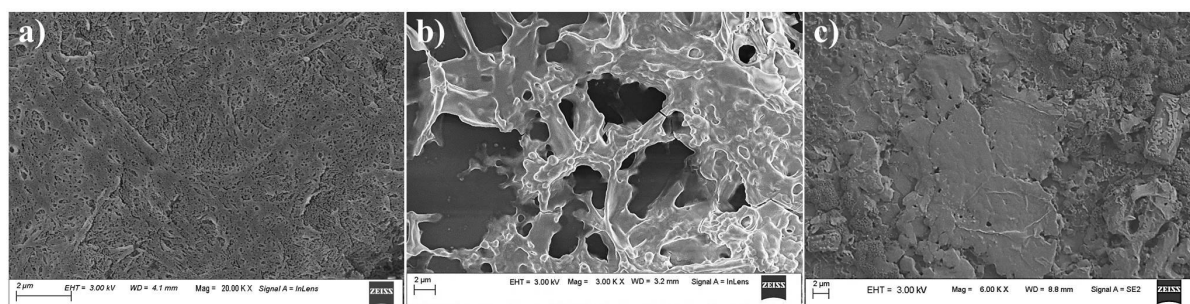

**Figure S6:** FESEM images in sodium phosphate buffer (pH=7.0) of a) hydrogel of A1, b) hydrogel of A1 in EtOH/phosphate buffer system at MGC and c) viscous solution of A2 at 5 mM.

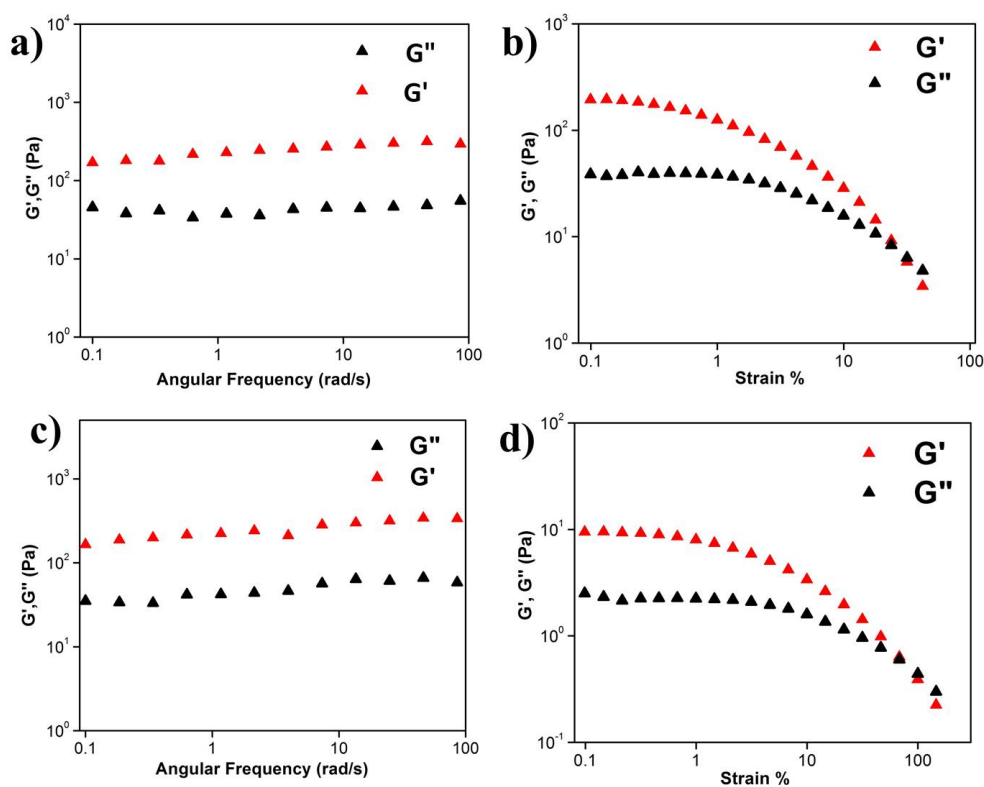

**Figure S7:** Angular frequency and strain dependence of the dynamic storage moduli ( $G'$ ) and the loss moduli ( $G''$ ) of hydrogel A1 at 0.45 % wt/v in a, b) sodium phosphate buffer; c, d) 20% EtOH/phosphate buffer system respectively.

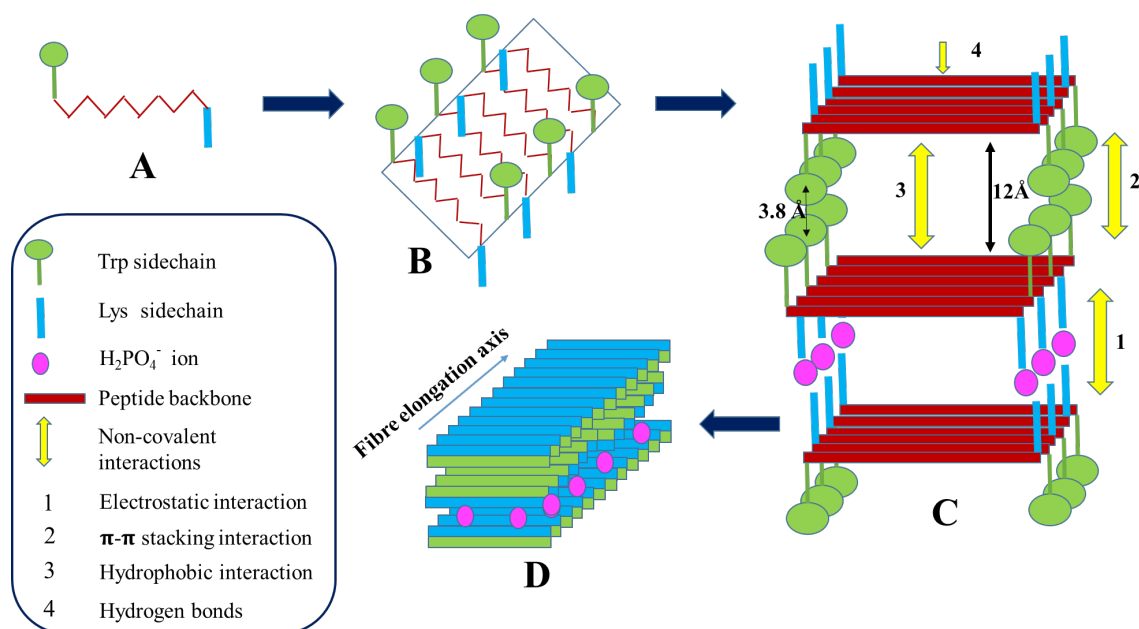

**Figure S8:** Schematic representation of the molecular arrangement involved in the self-assembly of A1.

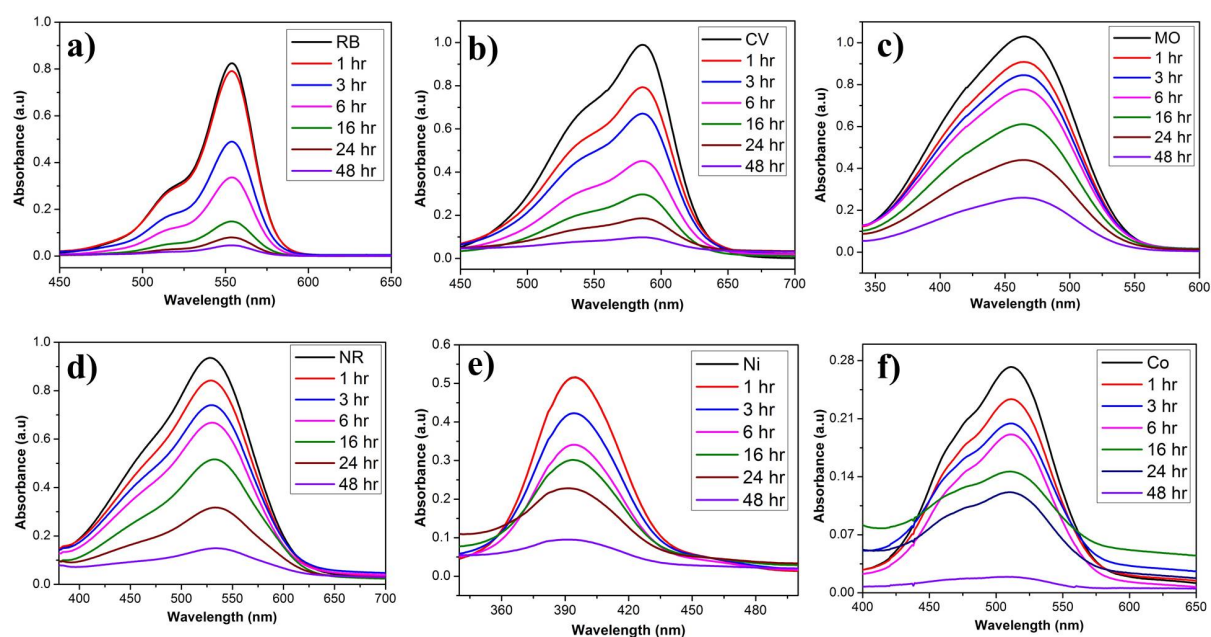

**Figure S9:** Dye/Metal ion absorption by A1 hydrogel a) RB b) CV c) MO d) NR e) Nickel Chloride and f) Cobalt Chloride by UV-Vis spectroscopy.

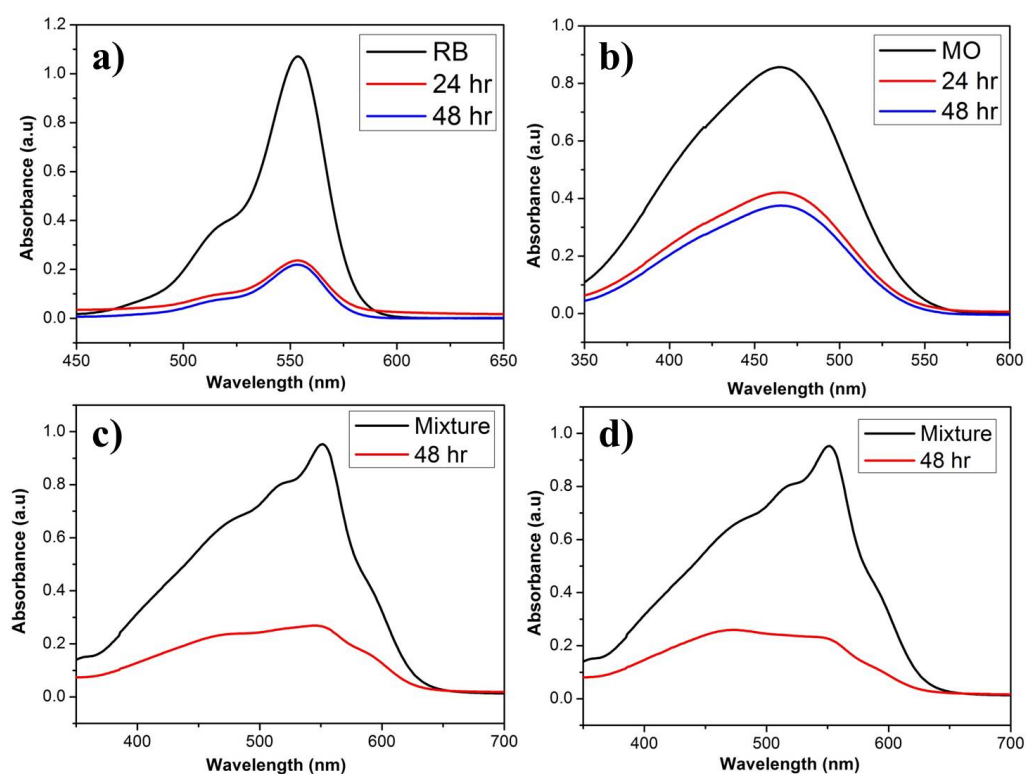

**Figure S10:** UV-Vis studies to show a) RB and b) MO absorbed by co-assembled A1+A2 (1:1) hydrogel. UV-Vis studies to show an all component mixture absorption by hydrogels c) A1 and d) A1+A2.

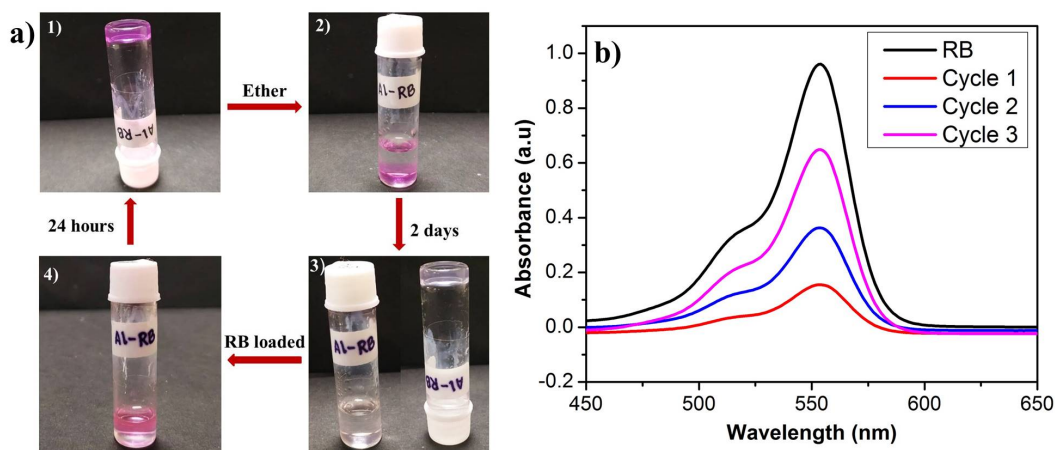

**Figure S11:** Reusability of hydrogel A1: a) Reusing hydrogel A1 for dye absorption and b) UV-Vis study for reusability of the hydrogel A1 with RB.

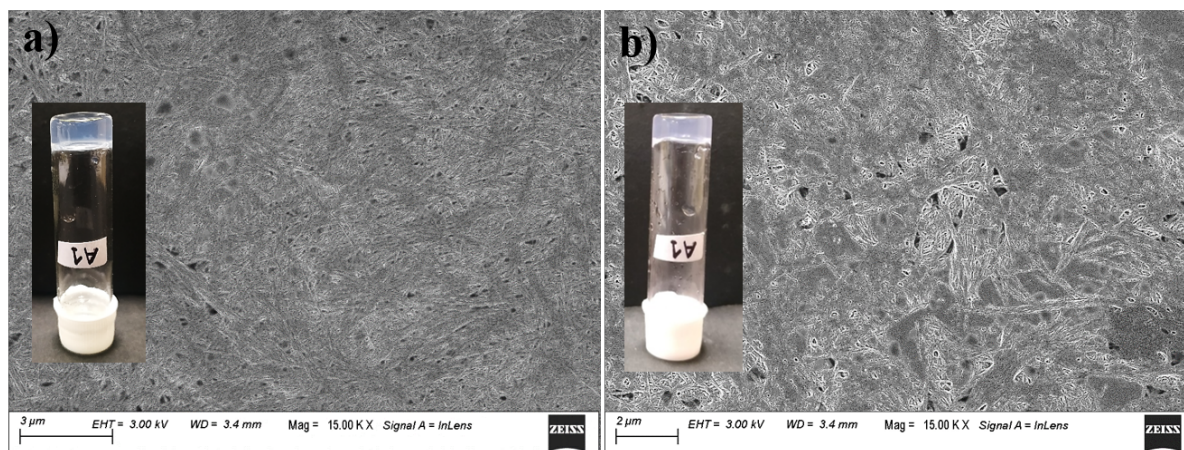

**Figure S12:** Morphology of hydrogel A1 a) before absorption and b) after release of the dye Rhodamine B.

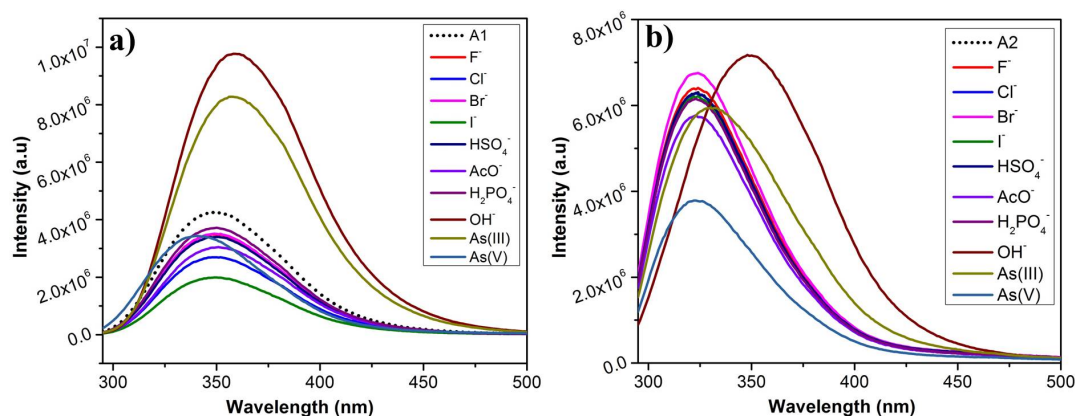

**Figure S13:** Sensing of anions by a) A1 and b) A2 (Anions=0.1mM, A1=0.1 mM and A2=0.1 mM).



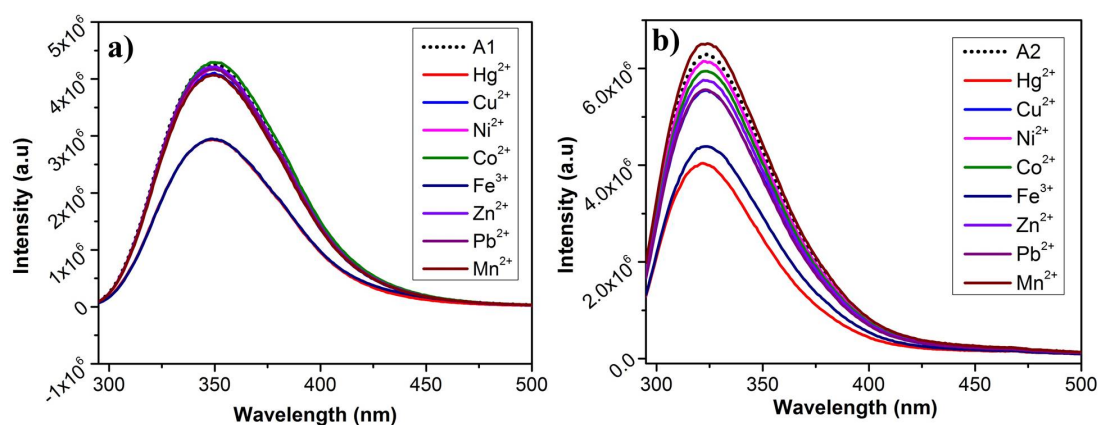

**Figure S14:** Sensing of metal ions by a) A1 and b) A2 (Metal ions=0.1mM, A1=0.1 mM and A2=0.1 mM).

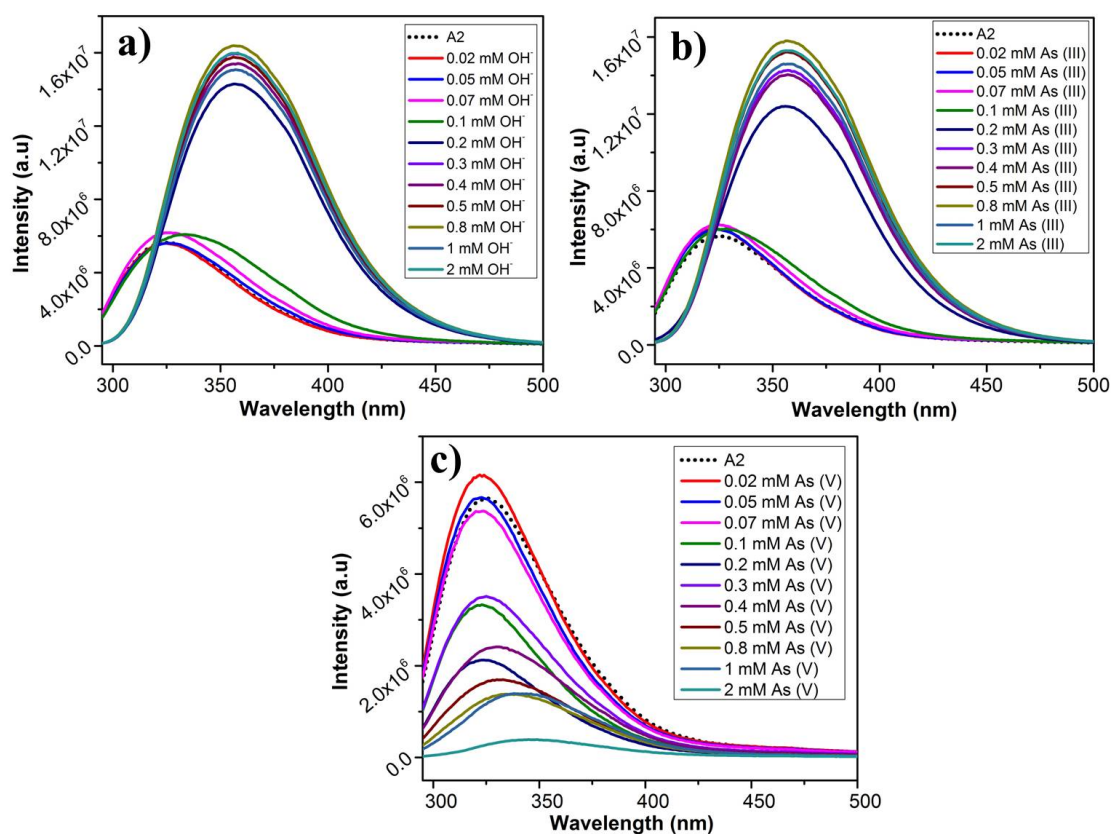

**Figure S15:** Anion sensing by A2: Titration of A2 with a)  $\text{OH}^-$ , b)  $\text{As(III)}$ , and c)  $\text{As(V)}$ .

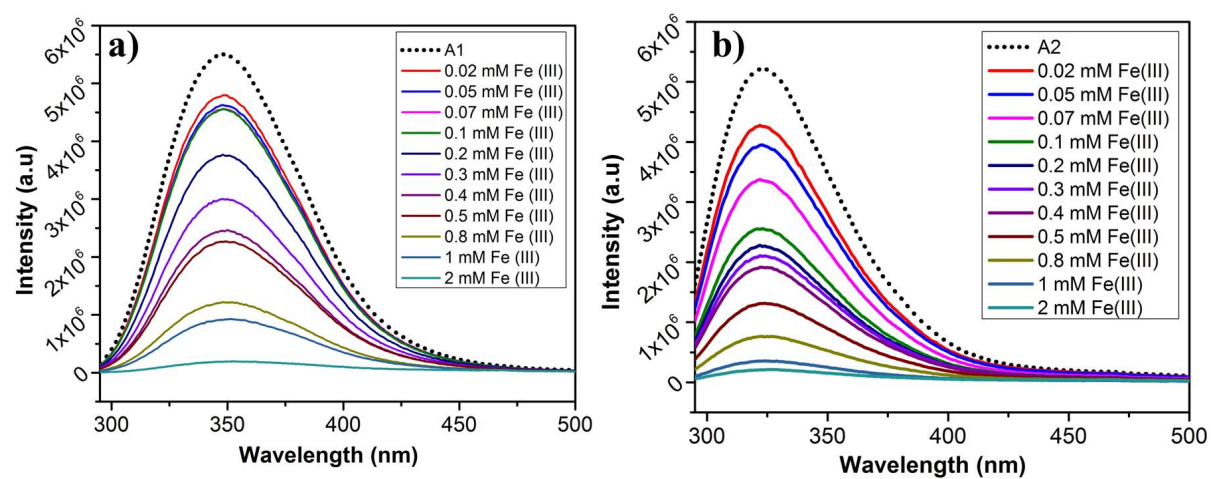

**Figure S16:** Fe<sup>3+</sup> sensing by A1 and A2: Titration of a) A1 and b) A2 with different concentrations of Fe<sup>3+</sup>.

## Tables

**Table S1:** Table summarizing gelation properties, physical state, Minimum Gelation Concentration (MGC) and sol-gel conversion temperature ( $T_{gel}$ ) of A1, A2 and various ratios of A1+A2 mixtures. (PB: sodium phosphate buffer)

| Peptides | Solvent system          | MGC                            | $T_{gel}$ (°C) | State            |
|----------|-------------------------|--------------------------------|----------------|------------------|
| A1       | PB (pH=7.0)             | 0.20 %w/v                      | 60             | Transparent      |
| A1       | PB (pH=7.0)+<br>Ethanol | 0.20 %w/v                      | 54             | Translucent      |
| A2       | PB (pH=7.0)             | -                              | -              | Viscous solution |
| A1+A2    | PB (pH=7.0)             | 1 mg each in 0.5 ml (0.40%w/v) | 56             | Translucent      |
| A1+A2    | PB (pH=7.0)             | 1+ 0.5 mg in 0.5 ml (0.30%w/v) | 52             | Translucent      |
| A1+A2    | PB (pH=7.0)             | 1+ 2 mg in 0.5 ml (0.60%w/v)   | -              | Viscous solution |
| A1+A2    | PB (pH=7.0)             | 1+ 3 mg in 0.5 ml (0.80%w/v)   | -              | Solution         |

**Table S2:** Interplanar distances observed from the PXRD in A1, A2, A1 xerogel, 1:0.5 and 1:1 co-assembled xerogels of A1+A2.

|                            | Peak 1                                          | Peak 2                                          | Peak 3                                          | Peak 4                                          |
|----------------------------|-------------------------------------------------|-------------------------------------------------|-------------------------------------------------|-------------------------------------------------|
| A1                         | $2\theta=7.64^\circ$ ,<br>$d=11.56 \text{ \AA}$ | $2\theta=23.16^\circ$ ,<br>$d=3.84 \text{ \AA}$ | -                                               | -                                               |
| A2                         | $2\theta=7.82^\circ$ ,<br>$d=11.29 \text{ \AA}$ | $2\theta=22.86^\circ$ ,<br>$d=3.88 \text{ \AA}$ | -                                               | -                                               |
| A1 (xerogel)               | -                                               | -                                               | $2\theta=7.20^\circ$ ,<br>$d=12.27 \text{ \AA}$ | $2\theta=23.12^\circ$ ,<br>$d=3.84 \text{ \AA}$ |
| A1+A2 (1:0.5)<br>(xerogel) | -                                               | -                                               | $2\theta=7.02^\circ$ ,<br>$d=12.58 \text{ \AA}$ | $2\theta=22.92^\circ$ ,<br>$d=3.87 \text{ \AA}$ |
| A1+A2 (1:1)<br>(xerogel)   | -                                               | -                                               | $2\theta=7.12^\circ$ ,<br>$d=12.40 \text{ \AA}$ | $2\theta=25.02^\circ$ ,<br>$d=3.55 \text{ \AA}$ |

**Table S3:** Percentage of RB absorbed by hydrogel in three cycles

| No. of Cycles | RB absorbed (%) |
|---------------|-----------------|
| Cycle 1       | 88.95           |
| Cycle 2       | 73.80           |
| Cycle 2       | 52.90           |

**Table S4:** Dependence of absorption of  $\text{Hg}^{2+}$  and  $\text{Pb}^{2+}$  by A1 hydrogel on the counter anions

| Salts            | Loaded (mg/L) | Conc. of $\text{Pb}^{2+}/\text{Hg}^{2+}$ in supernatant (mg/L) | Conc. of $\text{Pb}^{2+}/\text{Hg}^{2+}$ absorbed (mg/L) | % absorbed |
|------------------|---------------|----------------------------------------------------------------|----------------------------------------------------------|------------|
| Lead chloride    | 20            | 2.48                                                           | 17.52                                                    | 87.60      |
| Lead acetate     | 20            | 2.93                                                           | 17.07                                                    | 85.35      |
| Lead nitrate     | 20            | 2.61                                                           | 17.39                                                    | 86.95      |
| Mercury acetate  | 100           | 37.7                                                           | 62.30                                                    | 62.30      |
| Mercury chloride | 100           | 29.9                                                           | 70.10                                                    | 70.10      |
